# Supplementary material for: Identification of bacteria on Thai banknotes and coins using MALDI-TOF mass spectrometry and their phenotypic antimicrobial susceptibility profiles
Source: PeerJ. 2025 May 20;13:e19465. doi: 10.7717/peerj.19465 (PMC12101445; doi:10.7717/peerj.19465)
Supplement: Supplemental Information 1 [file peerj-13-19465-s001.xlsx]

## Sheet: % Bacterial detection
Supplementary Table S1. Detail of sample collection and percentage of bacterial detection on Thai banknotes and coins from retail fresh meat stores
Market		Pork/Chicken		Seafood		Fish		Total					Percentage of bacterial detection on Thai banknotes and coins
Label	District	B	C	B	C	B	C	B	C			Bank		Total	G on BA	%	G on MAC	%	G on TSA	%
I) Phra Nakhon Zone													Pork/chicken shop	59	57	96.6102	18	30.5085	59	100
A	Sai Mai	3	3	3	3	1	3	7	9				Seafood shop	61	53	86.8852	15	24.5902	61	100
B	Bang Sue	3	3	3	3	3	3	9	9				Fish shop	30	30	100	5	16.6667	30	100
C	Bang Khen	3	2	3	3	3	3	9	8				Total	150	140	93.3333	38	25.3333	150	100
D	Bang Khen	3	3	3	3	-	3	6	9
E	Khan Na Yao	3	3	3	3	3	2	9	8
F	Min Buri	2	3	1	3	1	3	4	9			Coin		Total	G on BA	%	G on MAC	%	G on TSA	%
G	Lak Si	3	4	4	4	3	4	10	12				Pork/chicken shop	59	27	45.7627	2	3.38983	58	98.3051
H	Chatuchak	2	2	3	2	-	-	5	4				Seafood shop	54	10	18.5185	1	1.85185	52	96.2963
I	Suan Lung	3	3	3	-	2	-	8	3				Fish shop	37	8	21.6216	0	0	35	94.5946
J	Prawet	2	2	3	2	2	2	7	6				Total	150	45	30	3	2	145	96.6667
K	Din Deang	4	3	4	3	4	4	12	10
L	Pathum Wan	4	4	4	4	-	-	8	8		B = Banknote
II) Thonburi								0	0		C = Coin
M	Bangkok Noi	4	3	4	-	1	-	9	3		G = Growth
N	Khlong San	3	4	4	4	1	-	8	8		BA = Blood agar
O*	Taling Chan	6	7	5	5	-	-	11	12		MAC = MacConkey agar
P	Suan Lung	4	4	4	4	-	4	8	12		TSA = Trypic soy ager
Q	Thung Khru	3	3	2	5	2	2	7	10
R	Thawi Watthana	1	3	3	-	1	1	5	4
S	Thawi Watthana	3	-	2	3	3	3	8	6
	Total	59	59	61	54	30	37	150	150
*Samples were collected from each market once, except for market O, which was sampled twice
