# Supplementary material for: Identification of bacteria on Thai banknotes and coins using MALDI-TOF mass spectrometry and their phenotypic antimicrobial susceptibility profiles
Source: PeerJ. 2025 May 20;13:e19465. doi: 10.7717/peerj.19465 (PMC12101445; doi:10.7717/peerj.19465)
Supplement: Supplemental Information 2 [file peerj-13-19465-s002.xlsx]

## Sheet: Colony count 
Supplementary Table S2. Enumeration of bacterial colonies grown in tryptic soy agar (TSA) from banknotes and coins
Sample	Sample type	Value	Shop type	Code	Colony count (CFU/mL) on TSA
B1	Bank	100	Pork/chicken	I1-1-B1	TMTC	Bank = Banknote		Bank		Pork/chicken	Seafood	Fish	Total	Percentage			colony count	Coin		Pork/chicken	Seafood	Fish	Total	Percentage
B2	Bank	100	Pork/chicken	I1-2-B2	TMTC	TMTC = Too many to count			TMTC	46	34	25	105	70					TMTC	8	2	1	11	7.33333
B3	Bank	20	Pork/chicken	I1-2-B3	TMTC				1000-3000 CFU/ml	6	14	3	23	15.3333					1000-3000 CFU/ml	12	4	3	19	12.6667
B9	Bank	100	Pork/chicken	J1-1-B9	TMTC				<1000 CFU/ml	7	13	2	22	14.6667					<1000 CFU/ml	38	46	31	115	76.6667
B10	Bank	20	Pork/chicken	J1-1-B10	TMTC				No growth	0	0	0	0	0					No growth	1	2	2	5	3.33333
B16	Bank	100	Pork/chicken	C1-1-B16	TMTC				total	59	61	30	150	100					total	59	54	37	150	100
B17	Bank	100	Pork/chicken	C1-1-B17	TMTC
B25	Bank	100	Pork/chicken	H1-1-B25	TMTC			Bank		Pork/chicken	% of PC	Seafood	% of S	Fish	% of S		colony count	Coin		Pork/chicken	% of PC	Seafood	% of S	Fish	% of S
B30	Bank	20	Pork/chicken	A1-1-B30	TMTC				TMTC	46	77.9661	34	55.7377	25	83.3333				TMTC	8	13.5593	2	3.7037	1	2.7027
B31	Bank	20	Pork/chicken	A1-2-B31	TMTC				1000-3000 CFU/ml	6	10.1695	14	22.9508	3	10				1000-3000 CFU/ml	12	20.339	4	7.40741	3	8.10811
B32	Bank	20	Pork/chicken	A1-2-B32	TMTC				<1000 CFU/ml	7	11.8644	13	21.3115	2	6.66667				<1000 CFU/ml	38	64.4068	46	85.1852	31	83.7838
B37	Bank	100	Pork/chicken	B1-1-B37	TMTC				No growth	0	0	0	0	0	0				No growth	1	1.69492	2	3.7037	2	5.40541
B39	Bank	100	Pork/chicken	B1-2-B39	TMTC				total	59	100	61	100	30	100				total	59	100	54	100	37	100
B46	Bank	20	Pork/chicken	E1-2-B46	TMTC
B47	Bank	20	Pork/chicken	E1-2-B47	TMTC
B48	Bank	20	Pork/chicken	E1-2-B48	TMTC
B55	Bank	100	Pork/chicken	D1-1-B55	TMTC
B56	Bank	100	Pork/chicken	D1-1-B56	TMTC
B57	Bank	20	Pork/chicken	D1-2-B57	TMTC
B61	Bank	20	Pork/chicken	F1-1-B61	TMTC
B62	Bank	20	Pork/chicken	F1-2-B62	TMTC
B65	Bank	20	Pork/chicken	T1-1-B65	TMTC
B66	Bank	20	Pork/chicken	T1-2-B66	TMTC
B67	Bank	20	Pork/chicken	T1-2-B67	TMTC
B73	Bank	20	Pork/chicken	S1-2-B73	TMTC
B78	Bank	20	Pork/chicken	O1-1-B78	TMTC
B84	Bank	20	Pork/chicken	M1-1-B84	TMTC
B85	Bank	20	Pork/chicken	M1-1-B85	TMTC
B86	Bank	20	Pork/chicken	M1-2-B86	TMTC
B87	Bank	20	Pork/chicken	M1-2-B87	TMTC
B93	Bank	20	Pork/chicken	N1-1-B93	TMTC
B94	Bank	20	Pork/chicken	N1-2-B94	TMTC
B95	Bank	20	Pork/chicken	N1-2-B95	TMTC
B102	Bank	20	Pork/chicken	P1-2-B102	TMTC
B104	Bank	20	Pork/chicken	P1-3-B104	TMTC
B110	Bank	20	Pork/chicken	L1-1-B110	TMTC
B111	Bank	100	Pork/chicken	L1-2-B111	TMTC
B112	Bank	20	Pork/chicken	L1-3-B112	TMTC
B117	Bank	100	Pork/chicken	K1-1-B117	TMTC
B118	Bank	100	Pork/chicken	K1-1-B118	TMTC
B120	Bank	20	Pork/chicken	K1-2-B120	TMTC
B129	Bank	20	Pork/chicken	G1-1-B129	TMTC
B131	Bank	20	Pork/chicken	G1-2-B131	TMTC
B139	Bank	100	Pork/chicken	R1-1-B139	TMTC
B140	Bank	20	Pork/chicken	R1-1-B140	TMTC
B141	Bank	20	Pork/chicken	R1-2-B141	TMTC
B7	Bank	20	Fish	I3-1-B7	TMTC
B14	Bank	100	Fish	J3-1-B14	TMTC
B15	Bank	100	Fish	J3-1-B15	TMTC
B22	Bank	20	Fish	C3-1-B22	TMTC
B23	Bank	20	Fish	C3-2-B23	TMTC
B24	Bank	20	Fish	C3-2-B24	TMTC
B36	Bank	20	Fish	A3-1-B36	TMTC
B45	Bank	20	Fish	B3-2-B45	TMTC
B52	Bank	20	Fish	E3-1-B52	TMTC
B53	Bank	20	Fish	E3-1-B53	TMTC
B54	Bank	20	Fish	E3-2-B54	TMTC
B64	Bank	20	Fish	F3-1-B64	TMTC
B70	Bank	20	Fish	T3-1-B70	TMTC
B71	Bank	20	Fish	T3-2-B71	TMTC
B72	Bank	20	Fish	T3-3-B72	TMTC
B77	Bank	20	Fish	S3-1-B77	TMTC
B92	Bank	100	Fish	M3-1-B92	TMTC
B100	Bank	20	Fish	N3-1-B100	TMTC
B125	Bank	20	Fish	K3-1-B125	TMTC
B126	Bank	20	Fish	K3-2-B126	TMTC
B127	Bank	20	Fish	K3-2-B127	TMTC
B128	Bank	20	Fish	K3-2-B128	TMTC
B136	Bank	20	Fish	G3-1-B136	TMTC
B137	Bank	20	Fish	G3-1-B137	TMTC
B144	Bank	20	Fish	R3-1-B144	TMTC
B4	Bank	100	Seafood	I2-1-B4	TMTC
B5	Bank	100	Seafood	I2-1-B5	TMTC
B6	Bank	100	Seafood	I2-1-B6	TMTC
B19	Bank	100	Seafood	C2-1-B19	TMTC
B20	Bank	20	Seafood	C2-1-B20	TMTC
B33	Bank	100	Seafood	A2-1-B33	TMTC
B34	Bank	20	Seafood	A2-1-B34	TMTC
B35	Bank	100	Seafood	A2-2-B35	TMTC
B40	Bank	100	Seafood	B2-1-B40	TMTC
B42	Bank	100	Seafood	B2-2-B42	TMTC
B49	Bank	100	Seafood	E2-1-B49	TMTC
B50	Bank	100	Seafood	E2-1-B50	TMTC
B63	Bank	100	Seafood	F2-1-B63	TMTC
B68	Bank	100	Seafood	T2-1-B68	TMTC
B74	Bank	100	Seafood	S2-1-B74	TMTC
B81	Bank	100	Seafood	O2-1-B81	TMTC
B82	Bank	100	Seafood	O2-2-B82	TMTC
B88	Bank	100	Seafood	M2-1-B88	TMTC
B89	Bank	20	Seafood	M2-1-B89	TMTC
B91	Bank	20	Seafood	M2-1-B91	TMTC
B96	Bank	100	Seafood	N2-1-B96	TMTC
B97	Bank	100	Seafood	N2-1-B97	TMTC
B98	Bank	100	Seafood	N2-1-B98	TMTC
B99	Bank	100	Seafood	N2-1-B99	TMTC
B105	Bank	100	Seafood	P2-1-B105	TMTC
B107	Bank	100	Seafood	P2-2-B107	TMTC
B114	Bank	100	Seafood	L2-2-B114	TMTC
B123	Bank	20	Seafood	K2-1-B123	TMTC
B124	Bank	20	Seafood	K2-1-B124	TMTC
B132	Bank	100	Seafood	G2-1-B132	TMTC
B133	Bank	100	Seafood	G2-1-B133	TMTC
B134	Bank	100	Seafood	G2-2-B134	TMTC
B135	Bank	20	Seafood	G2-2-B135	TMTC
B143	Bank	20	Seafood	R2-1-B143	TMTC
B108	Bank	20	Seafood	P2-2-B108	2765
B149	Bank	100	Seafood	O2-1-B149	2560
B90	Bank	20	Seafood	M2-1-B90	2340
B121	Bank	100	Seafood	K2-1-B121	2180
B115	Bank	20	Seafood	L2-2-B115	2120
B142	Bank	100	Seafood	R2-1-B142	2035
B113	Bank	100	Seafood	L2-1-B113	1745
B21	Bank	20	Seafood	C2-2-B21	1735
B76	Bank	100	Seafood	S2-2-B76	1430
B41	Bank	20	Seafood	B2-1-B41	1425
B51	Bank	20	Seafood	E2-2-B51	1410
B116	Bank	20	Seafood	L2-3-B116	1405
B59	Bank	20	Seafood	D2-1-B59	1130
B83	Bank	20	Seafood	O2-2-B83	1130
B44	Bank	20	Fish	B3-1-B44	2570
B145	Bank	100	Fish	R3-2-B145	2510
B43	Bank	20	Fish	B3-1-B43	1020
B109	Bank	100	Pork/chicken	L1-1-B109	2700
B38	Bank	20	Pork/chicken	B1-1-B38	2175
B101	Bank	20	Pork/chicken	P1-1-B101	2110
B148	Bank	100	Pork/chicken	O1-3-B148	1960
B119	Bank	20	Pork/chicken	K1-1-B119	1620
B130	Bank	20	Pork/chicken	G1-1-B130	1370
B147	Bank	100	Pork/chicken	O1-3-B147	900
B80	Bank	20	Pork/chicken	O1-3-B80	600
B18	Bank	100	Pork/chicken	C1-2-B18	550
B146	Bank	20	Pork/chicken	O1-1-B146	515
B79	Bank	100	Pork/chicken	O1-2-B79	495
B103	Bank	20	Pork/chicken	P1-2-B103	445
B26	Bank	20	Pork/chicken	H1-2-B26	10
B138	Bank	20	Fish	G3-2-B138	815
B8	Bank	20	Fish	I3-1-B8	520
B58	Bank	100	Seafood	D2-1-B58	705
B106	Bank	20	Seafood	P2-1-B106	640
B13	Bank	20	Seafood	J2-1-B13	620
B60	Bank	100	Seafood	D2-2-B60	595
B122	Bank	100	Seafood	K2-1-B122	575
B11	Bank	100	Seafood	J2-1-B11	470
B75	Bank	20	Seafood	S2-1-B75	345
B12	Bank	20	Seafood	J2-1-B12	320
B150	Bank	20	Seafood	O2-1-B150	200
B69	Bank	20	Seafood	T2-1-B69	120
B27	Bank	20	Seafood	H2-1-B27	85
B29	Bank	20	Seafood	H2-2-B29	65
B28	Bank	20	Seafood	H2-1-B28	35
C3	Coin	1,2	Pork/chicken	I1-2-C3	TMTC
C24	Coin	10	Pork/chicken	A1-2-C24	TMTC
C51	Coin	1,2	Pork/chicken	D1-2-C51	TMTC
C80	Coin	10	Pork/chicken	M1-1-C80	TMTC
C85	Coin	1,2	Pork/chicken	N1-2-C85	TMTC
C86	Coin	1,2	Pork/chicken	N1-2-C86	TMTC
C123	Coin	5	Pork/chicken	G1-3-C123	TMTC
C135	Coin	1,2	Pork/chicken	R1-2-C135	TMTC
C139	Coin	5	Fish	R3-2-C139	TMTC
C12	Coin	10	Seafood	C2-1-C12	TMTC
C27	Coin	1,2	Seafood	A2-1-C27	TMTC
C1	Coin	10	Pork/chicken	I1-1-C1	1800
C113	Coin	10	Pork/chicken	K1-2-C113	2165
C74	Coin	1,2	Pork/chicken	S1-1-C74	2160
C50	Coin	1,2	Pork/chicken	D1-2-C50	2150
C58	Coin	10	Pork/chicken	F1-2-C58	1480
C103	Coin	10	Pork/chicken	L1-2-C103	1465
C134	Coin	5	Pork/chicken	R1-2-C134	1390
C10	Coin	1,2	Pork/chicken	C1-1-C10	1355
C111	Coin	5	Pork/chicken	K1-1-C111	1205
C145	Coin	5	Pork/chicken	O1-2-C145	1180
C23	Coin	1,2	Pork/chicken	A1-1-C23	1135
C11	Coin	1,2	Pork/chicken	C1-1-C11	1000
C63	Coin	5	Fish	F3-1-C63	2520
C70	Coin	1,2	Fish	T3-1-C70	1625
C64	Coin	5	Fish	F3-1-C64	1210
C109	Coin	1,2	Seafood	L2-2-C109	2380
C89	Coin	5	Seafood	N2-2-C89	2135
C25	Coin	10	Seafood	A2-1-C25	2020
C79	Coin	10	Seafood	O2-2-C79	1070
C112	Coin	5	Pork/chicken	K1-1-C112	875
C42	Coin	5	Pork/chicken	E1-2-C42	870
C72	Coin	10	Pork/chicken	S1-1-C72	780
C32	Coin	1,2	Pork/chicken	B1-2-C32	715
C93	Coin	10	Pork/chicken	P1-2-C93	655
C49	Coin	10	Pork/chicken	D1-1-C49	375
C133	Coin	10	Pork/chicken	R1-1-C133	355
C59	Coin	5	Pork/chicken	F1-2-C59	350
C33	Coin	1,2	Pork/chicken	B1-2-C33	340
C104	Coin	10	Pork/chicken	L1-2-C104	340
C105	Coin	10	Pork/chicken	L1-3-C105	335
C83	Coin	1,2	Pork/chicken	N1-1-C83	325
C124	Coin	5	Pork/chicken	G1-3-C124	290
C77	Coin	5	Pork/chicken	O1-2-C77	235
C91	Coin	10	Pork/chicken	P1-1-C91	200
C143	Coin	10	Pork/chicken	O1-1-C143	155
C5	Coin	5	Pork/chicken	J1-2-C5	145
C4	Coin	10	Pork/chicken	J1-1-C4	125
C92	Coin	1,2	Pork/chicken	P1-1-C92	125
C121	Coin	10	Pork/chicken	G1-3-C121	105
C31	Coin	5	Pork/chicken	B1-1-C31	95
C57	Coin	5	Pork/chicken	F1-1-C57	95
C22	Coin	5	Pork/chicken	A1-1-C22	90
C122	Coin	10	Pork/chicken	G1-3-C122	90
C82	Coin	5	Pork/chicken	M1-3-C82	75
C40	Coin	10	Pork/chicken	E1-1-C40	60
C73	Coin	5	Pork/chicken	S1-1-C73	60
C106	Coin	1,2	Pork/chicken	L1-3-C106	50
C19	Coin	5	Pork/chicken	H1-2-C19	35
C81	Coin	10	Pork/chicken	M1-3-C81	30
C144	Coin	1,2	Pork/chicken	O1-1-C144	30
C18	Coin	10	Pork/chicken	H1-2-C18	25
C41	Coin	1,2	Pork/chicken	E1-1-C41	20
C84	Coin	1,2	Pork/chicken	N1-2-C84	15
C76	Coin	10	Pork/chicken	O1-1-C76	10
C78	Coin	1,2	Pork/chicken	O1-3-C78	10
C94	Coin	5	Pork/chicken	P1-2-C94	10
C146	Coin	10	Pork/chicken	O1-3-C146	10
C9	Coin	10	Fish	J3-1-C9	705
C117	Coin	10	Fish	K3-1-C117	655
C29	Coin	1,2	Fish	A3-1-C29	380
C99	Coin	10	Fish	P3-1-C99	360
C8	Coin	10	Fish	J3-1-C8	335
C75	Coin	1,2	Fish	S3-1-C75	255
C65	Coin	5	Fish	F3-1-C65	215
C30	Coin	5	Fish	A3-1-C30	200
C100	Coin	10	Fish	P3-1-C100	175
C45	Coin	5	Fish	D3-2-C45	150
C44	Coin	5	Fish	D3-2-C44	115
C16	Coin	1,2	Fish	C3-1-C16	90
C15	Coin	10	Fish	C3-1-C15	85
C71	Coin	5	Fish	T3-2-C71	75
C102	Coin	10	Fish	P3-1-C102	75
C17	Coin	5	Fish	C3-2-C17	70
C43	Coin	5	Fish	D3-1-C43	50
C39	Coin	5	Fish	B3-2-C39	40
C131	Coin	1,2	Fish	G3-3-C131	40
C118	Coin	5	Fish	K3-1-C118	30
C119	Coin	1,2	Fish	K3-1-C119	30
C138	Coin	10	Fish	R3-2-C138	30
C37	Coin	10	Fish	B3-1-C37	25
C52	Coin	10	Fish	E3-2-C52	20
C101	Coin	10	Fish	P3-1-C101	20
C38	Coin	5	Fish	B3-1-C38	10
C53	Coin	5	Fish	E3-2-C53	10
C120	Coin	5	Fish	K3-2-C120	10
C129	Coin	10	Fish	G3-1-C129	10
C130	Coin	5	Fish	G3-3-C130	5
C132	Coin	10	Fish	G3-3-C132	5
C68	Coin	1,2	Seafood	T2-1-C68	610
C147	Coin	10	Seafood	O2-1-C147	535
C114	Coin	10	Seafood	K2-1-C114	470
C67	Coin	1,2	Seafood	T2-1-C67	435
C46	Coin	1,2	Seafood	E2-1-C46	275
C96	Coin	10	Seafood	P2-2-C96	240
C90	Coin	10	Seafood	N2-2-C90	230
C66	Coin	5	Seafood	T2-1-C66	225
C35	Coin	5	Seafood	B2-2-C35	190
C128	Coin	10	Seafood	G2-2-C128	135
C54	Coin	10	Seafood	D2-1-C54	110
C87	Coin	10	Seafood	N2-2-C87	100
C88	Coin	10	Seafood	N2-2-C88	100
C148	Coin	5	Seafood	O2-1-C148	90
C48	Coin	1,2	Seafood	E2-2-C48	85
C47	Coin	5	Seafood	E2-2-C47	80
C110	Coin	5	Seafood	L2-3-C110	80
C36	Coin	5	Seafood	B2-2-C36	75
C6	Coin	5	Seafood	J2-1-C6	65
C26	Coin	5	Seafood	A2-1-C26	65
C60	Coin	10	Seafood	F2-1-C60	60
C98	Coin	10	Seafood	P2-2-C98	55
C137	Coin	5	Seafood	R2-1-C137	55
C95	Coin	5	Seafood	P2-1-C95	50
C116	Coin	1,2	Seafood	K2-1-C116	50
C56	Coin	1,2	Seafood	D2-1-C56	45
C7	Coin	10	Seafood	J2-1-C7	40
C34	Coin	10	Seafood	B2-1-C34	40
C141	Coin	5	Seafood	R2-1-C141	40
C20	Coin	5	Seafood	H2-2-C20	30
C149	Coin	1,2	Seafood	O2-1-C149	30
C13	Coin	5	Seafood	C2-2-C13	25
C62	Coin	5	Seafood	F2-1-C62	25
C127	Coin	10	Seafood	G2-2-C127	25
C136	Coin	10	Seafood	R2-1-C136	25
C14	Coin	1,2	Seafood	C2-2-C14	20
C21	Coin	5	Seafood	H2-2-C21	20
C55	Coin	5	Seafood	D2-1-C55	20
C97	Coin	10	Seafood	P2-2-C97	20
C142	Coin	5	Seafood	R2-1-C142	20
C61	Coin	5	Seafood	F2-1-C61	15
C115	Coin	1,2	Seafood	K2-1-C115	15
C126	Coin	5	Seafood	G2-1-C126	15
C140	Coin	10	Seafood	R2-1-C140	15
C108	Coin	1,2	Seafood	L2-2-C108	10
C150	Coin	1,2	Seafood	O2-1-C150	5
C2	Coin	1,2	Pork/chicken	I1-2-C2	0
C28	Coin	5	Fish	A3-1-C28	0
C69	Coin	5	Fish	T3-1-C69	0
C107	Coin	1,2	Seafood	L2-1-C107	0
C125	Coin	10	Seafood	G2-1-C125	0
