# Supplementary material for: Identification of bacteria on Thai banknotes and coins using MALDI-TOF mass spectrometry and their phenotypic antimicrobial susceptibility profiles
Source: PeerJ. 2025 May 20;13:e19465. doi: 10.7717/peerj.19465 (PMC12101445; doi:10.7717/peerj.19465)
Supplement: Supplemental Information 3 [file peerj-13-19465-s003.xlsx]

## Sheet: MAlDI TOF Score 125
Supplementary Table S3. Bacteria were isolated and identified using the MALDI-TOF MS, and the analyzed score of each isolate was reported.
No.	Organism	isolate code	Maldi-tof score		Genus
1	Acinetobacter baumannii	T2-1-B68/S2	1.89			Family		Freq	percentage		Bank	Coin	chicken/pork	seafood	fish
2	Acinetobacter baumannii	P1-1-B101/S1	2.11		gram positive	Staphylococcaceae	Staphylococcus spp.	39	36.4486		28	11	20	14	5
3	Enterobacter kobei	F3-1-B64/S3	2.37		64		Mammaliicoccus spp.	2	1.86916		2		1	1
4	Enterobacter roggenkampii	F3-1-B64/S2	2.16				Macrococcus spp.	11	10.2804		9	2	8	2	1
5	Enterococcus casseliflavus	K3-2-B128/S1	2.37			Enterococcaceae	Enterococcus spp.	1	0.934579		1				1
6	Escherichia coli	T1-1-B65/S2	1.92			Aerococcaceae	Aerococcus spp.	3	2.80374		3			2	1
7	Pseudomonas putida	P2-1-B105/S1	2.08			Bacillaceae	Bacillus spp.	1	0.934579			1	1
8	Pseudomonas putida	O2-1-B149/S2	1.82				Priestia spp.	1	0.934579			1			1
9	Staphylococcus arlettae	E1-2-B46/S2	1.88				Lysinibacillus spp.	1	0.934579		1			1
10	Staphylococcus aureus	N3-1-B100/S1	2.45			Corynebacteriaceae	Corynebacterium spp.	1	0.934579		1		1
11	Staphylococcus epidermidis	R1-2-C135/S1	2.39			Micrococcaceae	Rothai spp.	4	3.73832		4			3	1
12	Staphylococcus epidermidis	A1-2-B31/S2	2.000-3.000
13	Staphylococcus haemolyticus	S3-1-B77/S1	2.45		gram negative	Enterobacteriaceae	Enterobacter spp.	2	1.86916		2				2
14	Staphylococcus hominis	I2-1-B5/S1	2.52		43		Escherichia spp.	1	0.934579		1		1
15	Staphylococcus hominis	F2-1-B63/S1	2.48				cronobacter spp.	1	0.934579		1			1
16	Staphylococcus hominis	G2-1-B132/S1	2.56				Pantoea spp.	2	1.86916		2		1	1
17	Staphylococcus kloosii	I1-1-C1/S1	2.35				Pluralibacter spp.	2	1.86916		2				2
18	Staphylococcus kloosii	S1-1-C74/S1	2.55			Moraxellaceae	Acinetobacter spp.	22	20.5607		22		11	8	3
19	Staphylococcus kloosii	M1-1-C80/S2	2.000-3.000			Aeromonadaceae	Aeromonas spp.	1	0.934579		1		1
20	Staphylococcus kloosii	I1-1-B1/S1	2.49			Pseudomonadaceae	Psuedomonas spp.	2	1.86916		2			2
21	Staphylococcus saprophyticus	G2-2-C127/S2	2.57			Xanthomonadaceae	Stenotrophomonas spp.	3	2.80374		1	2	3
22	Staphylococcus saprophyticus	C3-2-B24/S1	2.49			Comamonadaceae	Delftia spp.	2	1.86916		2		2
23	Staphylococcus saprophyticus	T3-1-B70/S1	2.67			Weeksellaceae	Empedobacter spp.	1	0.934579		1		1
24	Staphylococcus saprophyticus	S2-1-B74/S1	2.51			Hafniaceae	Mixta spp.	1	0.934579		1		1
25	Staphylococcus saprophyticus	O2-1-B81/S1	2.62			Neisseriaceae	Moraxella spp.	2	1.86916		2				2
26	Staphylococcus xylosus	C2-1-B19/S1	2.36			Brucellaceae	Ochrobactrum spp.	1	0.934579		1				1
27	Staphylococcus xylosus	G1-3-C123/S1	2.27					107	100		90	17	52	35	20
28	Stenotrophomonas maltophilia	N1-2-C84/S1	2.08	**DST 28 sample
29	Acinetobacter baumannii	D1-2-B57/S1	2.05				107/125	85.6
30	Acinetobacter bereziniae	N2-1-B96/S2	1.95
31	Acinetobacter bereziniae	N2-1-B99/S4	2.26		Species
32	Acinetobacter bereziniae	L2-2-B114/S1	2.36					Freq	percentage		chicken/pork	seafood	fish
33	Acinetobacter defluvii	E1-2-B48/S1	2.12			gram positive	Aerococcus viridans	3	2.80374			2	1
34	Acinetobacter gandensis	R1-1-B140/S2	1.79			64	Bacillus pumilus	1	0.934579		1
35	Acinetobacter indicus	M3-1-B92/S1	1.88				Corynebacterium casei	1	0.934579		1
36	Acinetobacter junii	R1-1-B140/S3	2.04				Enterococcus casseliflavus	1	0.934579				1
37	Acinetobacter lactucae	H1-1-B25/S1	2.24				Lysinibacillus fusiformis	1	0.934579			1
38	Acinetobacter pittii	E2-1-B49/S2	1.95				Macrococcus canis	2	1.86916		1	1
39	Acinetobacter radioresistens	K3-2-B128/S4	2.25				Macrococcus caseolyticus	9	8.41121		7	1	1
40	Acinetobacter seifertii	K2-1-B124/S2	2.25				Mammaliicoccus sciuri	2	1.86916		1	1
41	Acinetobacter ursingii	D1-1-B55/S3	2.29				Priestia megaterium	1	0.934579				1
42	Acinetobacter ursingii	O1-1-B78/S1	1.92				Rothia amarae	2	1.86916			1	1
43	Acinetobacter ursingii	L1-1-B110/S2	2.19				Rothia endophytica	2	1.86916			2
44	Acinetobacter ursingii	G3-1-B137/S1	2.17				Staphylococcus arlettae	1	0.934579		1
45	Acinetobacter variabilis	P2-1-B105/S2	2.03				Staphylococcus aureus	1	0.934579				1
46	Aerococcus viridans	T3-2-B71/S1	2.32				Staphylococcus epidermidis	3	2.80374		3
47	Aerococcus viridans	K2-1-B123/S1	2.3				Staphylococcus haemolyticus	1	0.934579				1
48	Aerococcus viridans	K2-1-B124/S1	2.35				Staphylococcus hominis	3	2.80374			3
49	Aeromonas veronii	E1-2-B48/S2	2.24				Staphylococcus kloosii	15	14.0187		12	3
50	Bacillus pumilus	M1-1-C80/S3	1.700-1.999				Staphylococcus saprophyticus	13	12.1495		3	7	3
51	Corynebacterium casei	D1-1-B55/S1	2				Staphylococcus xylosus	2	1.86916		1	1
52	Cronobacter sp	E2-1-B50/S3	2.2
53	Delftia tsuruhatensis	N1-2-C85/S1	2.37			gram negative	Acinetobacter baumannii	3	2.80374		2	1
54	Delftia tsuruhatensis	N1-2-C86/S1	2.4			43	Acinetobacter bereziniae	4	3.73832			4
55	Empedobacter falsenii	E1-2-B47/S1	2.16				Acinetobacter defluvii	1	0.934579		1
56	Macrococcus canis	N2-1-B99/S1	1.700-1.999				Acinetobacter gandensis	1	0.934579		1
57	Macrococcus canis	R1-1-B140/S1	1.96				Acinetobacter indicus	1	0.934579				1
58	Macrococcus caseolyticus	M1-1-C80/S1	2.000-3.000				Acinetobacter junii	1	0.934579		1
59	Macrococcus caseolyticus	K1-1-C112/S1	2.22				Acinetobacter lactucae	1	0.934579		1
60	Macrococcus caseolyticus (spp.)	I1-2-B2/S1	1.97				Acinetobacter pittii	1	0.934579			1
61	Macrococcus caseolyticus	L1-1-B110/S1	2.15				Acinetobacter radioresistens	1	0.934579				1
62	Mammaliicoccus sciuri	C2-1-B19/S2	2.55				Acinetobacter seifertii	1	0.934579			1
63	Mammaliicoccus sciuri	N1-2-B94/S2	2.000-3.000				Acinetobacter ursingii	6	5.60748		5		1
64	Mixta calida	C1-1-B16/S1	2.26				Acinetobacter variabilis	1	0.934579			1
65	Moraxella osloensis	F3-1-B64/S1	1.91				Aeromonas veronii	1	0.934579		1
66	Moraxella osloensis	S3-1-B77/S2	1.88				Cronobacter sp	1	0.934579			1
67	Ochrobactrum anthropi	K3-2-B128/S3	1.72				Delftia tsuruhatensis	2	1.86916		2
68	Pantoea eucrina	O2-1-B149/S1	2.36				Empedobacter falsenii	1	0.934579		1
69	Pantoea piersonii	C1-1-B16/S2	2.25				Enterobacter kobei	1	0.934579				1
70	Pluralibacter gergoviae	C3-2-B23/S1	2.21				Enterobacter roggenkampii	1	0.934579				1
71	Pluralibacter gergoviae	C3-2-B23/S2	1.87				Escherichia coli	1	0.934579		1
72	Priestia megaterium	C3-1-C15/S1	2.34				Mixta calida	1	0.934579		1
73	Rothia amarae	T3-3-B72/S1	2.2				Moraxella osloensis	2	1.86916				2
74	Rothia amarae	O2-2-B82/S1	2.21				Ochrombactrum amthropi	1	0.934579				1
75	Rothia endophytica	P2-2-B108/S2	1.98				Pantoea eucrina	1	0.934579			1
76	Stenotrophomonas maltophilia	N1-2-B94/S3	1.76	**Stock			Pantoea piersonii	1	0.934579		1
77	Acinetobacter bereziniae	N2-1-B97/S1	1.94				Pluralibacter gergoviae	2	1.86916				2
78	Acinetobacter ursingii	E1-2-B47/S2	2.33				Pseudomonas putida	2	1.86916			2
79	Acinetobacter ursingii	D1-1-B56/S1	2.25				Stenotrophomonas maltophilia	3	2.80374		3
80	Lysinibacillus fusiformis	I2-1-B6/S1	1.83								52	35	20	107
81	Macrococcus caseolyticus	I2-1-B4/S1	1.95
82	Macrococcus caseolyticus	J1-1-B10/S1	1.87
83	Macrococcus caseolyticus	A1-2-B31/S1	2.000-3.000
84	Macrococcus caseolyticus	E3-1-B52/S1	1.78
85	Macrococcus caseolyticus	D1-1-B55/S2	1.92
86	Rothia endophytica	P2-2-B108/S1	1.99
87	Staphylococcus epidermidis	A1-2-B32/S1	2.000-3.000
88	Staphylococcus kloosii	A1-2-C24/S1	2.47
89	Staphylococcus kloosii	A2-1-C27/S1	1.99
90	Staphylococcus kloosii	D1-2-C50/S1	2.45
91	Staphylococcus kloosii	D1-2-C51/S1	2.48
92	Staphylococcus kloosii	I1-1-B1/S2	2.61
93	Staphylococcus kloosii	E1-2-B46/S1	2.37
94	Staphylococcus kloosii	N2-1-B99/S2	2.000-3.000
95	Staphylococcus kloosii	P1-3-B104/S1	2.42
96	Staphylococcus kloosii	L1-1-B109/S1	2.54
97	Staphylococcus kloosii	L1-3-B112/S1	1.8
98	Staphylococcus kloosii	G2-2-C127/S1	2.54
99	Staphylococcus saprophyticus	E2-1-B49/S1	2.48
100	Staphylococcus saprophyticus	E2-1-B50/S1	2.54
101	Staphylococcus saprophyticus	M1-1-B84/S1	2.000-3.000
102	Staphylococcus saprophyticus	N1-2-B94/S1	2.000-3.000
103	Staphylococcus saprophyticus	K2-1-B123/S2	2.63
104	Staphylococcus saprophyticus	K3-1-B125/S1	2.55
105	Staphylococcus saprophyticus	G1-2-B131/S1	2.37
106	Staphylococcus saprophyticus	G2-1-B133/S1	2.53
107	Stenotrophomonas maltophilia	N1-2-C85/S2	1.99
108	No identification possible	I2-1-B4/S2	1.44
109	No identification possible	J3-1-B14/S1	1.45
110	No identification possible	A2-2-B35/S1	0.000-1.699
111	No identification possible	E2-1-B50/S2	1.66
112	No identification possible	F2-1-B63/S2	1.67
113	No identification possible	T1-1-B65/S1	1.48
114	No identification possible	T1-1-B65/S3	1.39
115	No identification possible	P1-3-B104/S2	1.51
116	No identification possible	N2-1-B96/S1	1.53
117	No identification possible	N2-1-B99/S3	1.6
118	No identification possible	K3-2-B128/S2	1.69
119	No identification possible	R2-1-B142/S1	1.48
120	No peak	T1-2-B66/S1
121	No peak	T2-1-B68/S1
122	No peak	M1-2-B87/S1
123	No peak	M2-1-B88/S1
124	No peak	G2-2-B134/S1
125	No peak	R1-1-B139/S1
		Identified 107/125
	0.000-1.699	18 sample	No score 7
	1.700-1.999	29 sample	No score 2
	2.000-3.000	78 sample	No score 9

## Sheet: Bac-Shop
No.	Pork/chicken Shop		Seafood Shop		Fish shop
	>2.000	1.700-1.999	>2.000	1.700-1.999	>2.000	1.700-1.999
1	Acinetobacter baumannii	Acinetobacter gandensis	Acinetobacter bereziniae	Acinetobacter baumannii	Acinetobacter radioresistens	Acinetobacter indicus
2	Acinetobacter baumannii	Acinetobacter ursingii	Acinetobacter bereziniae	Acinetobacter bereziniae	Acinetobacter ursingii	Macrococcus caseolyticus
3	Acinetobacter defluvii	Bacillus pumilus	Acinetobacter seifertii	Acinetobacter bereziniae	Aerococcus viridans	Moraxella osloensis
4	Acinetobacter junii	Escherichia coli*	Acinetobacter variabilis	Acinetobacter pittii	Enterobacter kobei	Moraxella osloensis
5	Acinetobacter lactucae	Macrococcus canis	Aerococcus viridans	Lysinibacillus fusiformis	Enterobacter roggenkampii	Ochrobactrum anthropi
6	Acinetobacter ursingii	Macrococcus caseolyticus	Aerococcus viridans	Macrococcus canis	Enterococcus casseliflavus	Pluralibacter gergoviae
7	Acinetobacter ursingii	Macrococcus caseolyticus	Cronobacter sp*	Macrococcus caseolyticus	Pluralibacter gergoviae
8	Acinetobacter ursingii	Macrococcus caseolyticus (spp.)	Mammaliicoccus sciuri	Pseudomonas putida	Priestia megaterium
9	Acinetobacter ursingii	Staphylococcus arlettae	Pantoea eucrina	Rothia endophytica	Rothia amarae
10	Aeromonas veronii*	Staphylococcus kloosii	Pseudomonas putida	Rothia endophytica	Staphylococcus aureus
11	Corynebacterium casei	Stenotrophomonas maltophilia	Rothia amarae	Staphylococcus kloosii	Staphylococcus haemolyticus
12	Delftia tsuruhatensis	Stenotrophomonas maltophilia	Staphylococcus hominis		Staphylococcus saprophyticus
13	Delftia tsuruhatensis		Staphylococcus hominis		Staphylococcus saprophyticus
14	Empedobacter falsenii		Staphylococcus hominis		Staphylococcus saprophyticus
15	Macrococcus caseolyticus		Staphylococcus kloosii
16	Macrococcus caseolyticus		Staphylococcus kloosii
17	Macrococcus caseolyticus		Staphylococcus saprophyticus
18	Macrococcus caseolyticus		Staphylococcus saprophyticus
19	Mammaliicoccus sciuri		Staphylococcus saprophyticus
20	Mixta calida		Staphylococcus saprophyticus
21	Pantoea piersonii		Staphylococcus saprophyticus
22	Staphylococcus epidermidis		Staphylococcus saprophyticus
23	Staphylococcus epidermidis		Staphylococcus saprophyticus
24	Staphylococcus epidermidis		Staphylococcus xylosus
25	Staphylococcus kloosii
26	Staphylococcus kloosii
27	Staphylococcus kloosii
28	Staphylococcus kloosii
29	Staphylococcus kloosii
30	Staphylococcus kloosii
31	Staphylococcus kloosii
32	Staphylococcus kloosii
33	Staphylococcus kloosii
34	Staphylococcus kloosii
35	Staphylococcus kloosii
36	Staphylococcus saprophyticus
37	Staphylococcus saprophyticus
38	Staphylococcus saprophyticus
39	Staphylococcus xylosus
40	Stenotrophomonas maltophilia
	40	12	24	11	14	6	107
