# Supplementary material for: Identification of bacteria on Thai banknotes and coins using MALDI-TOF mass spectrometry and their phenotypic antimicrobial susceptibility profiles
Source: PeerJ. 2025 May 20;13:e19465. doi: 10.7717/peerj.19465 (PMC12101445; doi:10.7717/peerj.19465)
Supplement: Supplemental Information 4 [file peerj-13-19465-s004.xlsx]

## Sheet: infection System
	Supplementary Table S4. Description of bacteria previously reported for causing infection in various systems
gram	Microorganism (n)	Pathogen type	shop			Pathogen type	Infection systems
			PC	S	F		RT	SST	UTI	CNS	BL	GI	OTHER	No report
GN	Acinetobacter baumannii (n=3)	H	2	1		H	X	X	X	X	X						RT= Respiratory tract infection
GN	Acinetobacter bereziniae (n=4)	H		4		H					X						SST = Skin and soft tissue infections
GN	Acinetobacter defluvii (n=1)	NH	1											X			UTI = Urinary tract infection
GN	Acinetobacter gandensis (n=1)	NH	1											X			W = Wound infection
GN	Acinetobacter indicus (n=1)	H			1	H								X			BL= Bloodstream infection
GN	Acinetobacter junii (n=1)	H	1			H			X								CNS = Central nervous system
GN	Acinetobacter lactucae (n=1)	NH	1										X				GI = Gastrointestinal infection
GN	Acinetobacter pittii (n=1)	H		1		H	X	X			X						H = Human
GN	Acinetobacter radioresistens (n=1)	H			1	H	X				X						NH = Non-human
GN	Acinetobacter seifertii (n=1)	NH		1									X
GN	Acinetobacter ursingii (n=6)	H	5		1	H					X
GN	Acinetobacter variabilis (n=1)	NH		1									X
GN	Aeromonas veronii (n=1)	H	1			H	X	X	X		X	X
GN	Cronobacter sp (n=1)	H		1		H	X	X			X		X
GN	Delftia tsuruhatensis (n=2)	H	2			H	X
GN	Empedobacter falsenii (n=1)	H	1			H	X		X
GN	Enterobacter kobei (n=1)	H			1	H	X		X		X		X
GN	Enterobacter roggenkampii (n=1)	H			1	H			X		X	X
GN	Escherichia coli (n=1)	H	1			H	X		X		X	X
GN	Mixta calida (n=1)	H	1			H				X	X
GN	Moraxella osloensis (n=2)	H			2	H				X	X		X
GN	Ochrobactrum anthropi (n=1)	H			1	H					X
GN	Pantoea eucrina (n=1)	NH		1		NH
GN	Pantoea piersonii (n=1)	NH	1			NH
GN	Pluralibacter gergoviae (n=2)	H			2	H							X
GN	Pseudomonas putida (n=2)	H		2		H	X	X			X		X
GN	Stenotrophomonas maltophilia (n=3)	H	3			H	X	X	X		X		X
GP	Aerococcus viridans (n=3)	H		2	1	H			X		X		X
GP	Bacillus pumilus (n=1)	H	1			H		X			X
GP	Corynebacterium casei (n=1)	H	1			H								X
GP	Enterococcus casseliflavus (n=1)	H			1	H					X
GP	Lysinibacillus fusiformis (n=1)	H		1		H	X	X			X
GP	Macrococcus canis (n=2)	H	1	1		H		X
GP	Macrococcus caseolyticus (n=9)	H	7	1	1	H								X
GP	Mammaliicoccus sciuri (n=2)	H	1	1		H		X	X		X
GP	Priestia megaterium (n=1)	H			1	H		X		X	X
GP	Rothia amarae (n=2)	NH		1	1	NH
GP	Rothia endophytica (n=2)	NH		2		NH
GP	Staphylococcus arlettae (n=1)	H	1			H					X		X
GP	Staphylococcus aureus (n=1)	H			1	H	X	X			X		X
GP	Staphylococcus epidermidis (n=3)	H	3			H					X		X
GP	Staphylococcus haemolyticus (n=1)	H			1	H				X	X		X				Total (n)	RT	SST	UT	CNS	BL	GI	OTHER
GP	Staphylococcus hominis (n=3)	H		3		H					X		X				46	13	13	11	5	27	4	15
GP	Staphylococcus kloosii (n=15)	H	12	3		H		X			X						Total	RT	SST	UT	CNS	BL	GI	OTHER
GP	Staphylococcus saprophyticus (n=13)	H	3	7	3	H			X			X					%	28.2609	28.2609	23.913	10.8696	58.6957	8.69565	32.6087
GP	Staphylococcus xylosus (n=2)	NH	1	1		NH
							13	13	11	5	27	4	15	5
	46		52	35	20	n=46
						H=36
		H = Human				NH=5
		NH =				Blank=5

## Sheet: Prevalence
	Gram stain	Bacterial speicies	No. of bacteria isolated from			Total	Pathogenesis						R = Respiratory tract infection
	Gram stain		Pork/chicken	Seafood	Fish		Pathogen type(H/NH)	Tract infection		ref.			SSTIs = skin and soft tissue infections
	Gram negative bacilli	Acinetobacter baumannii	0	1		1	H	HAI ; R, SSTIs, W, UTI, B, N		doi: 10.4161/viru.19700	DOI: 10.1016/j.jhin.2009.03.032		UTI = Urinary tract infection
	Gram negative bacilli	Acinetobacter bereziniae		4		4	Opportunistic pathogen (H)	B		https://doi.org/10.1093/jambio/lxad145			W = Wound infection
	Gram negative coccobacilli	Acinetobacter defluvii	1			1	NH						B = Bloodstream infection
	Gram negative bacilli	Acinetobacter gandensis	1			1	NH						N = Nervous system
	Gram negative bacilli	Acinetobacter indicus			1	1	Opportunistic pathogen (H) rare	Not reported		https://doi.org/10.1093/jambio/lxad145			GI = gastrointestinal infection
	Gram negative bacilli	Acinetobacter junii	1			1	H (rare)	UTI		doi: 10.1016/j.eucr.2020.101209
	Gram negative bacilli	Acinetobacter lactucae	1			1	NH				*Acinetobacter non-baumannii (Anb) มักก่อให้เกิด HAI	DOI: 10.3390/antibiotics12081301
	Gram negative coccobacilli	Acinetobacter pittii		1		1	Opportunistic pathogen (H)	HAI ; B, W, R (ventilator-associated pneumonia)		https://doi.org/10.3389/fmicb.2024.1412775			H = Human source
	Gram negative coccobacilli	Acinetobacter radioresistens			1	1	Opportunistic pathogen (H) rare	pneumonia, B		doi: 10.1016/j.idcr.2019.e00495			NH = Non-human source
	Gram negative bacilli	Acinetobacter seifertii		1		1	NH
	Gram negative coccobacilli	Acinetobacter ursingii	0		1	1	Opportunistic pathogen (H)	B		https://doi.org/10.1093/jambio/lxad145
	Gram negative coccobacilli	Acinetobacter variabilis		1		1	NH
	Gram positive cocci	Aerococcus viridans		2	1	3	H	UTI, B, endocarditis		doi: 10.7860/JCDR/2017/23997.9229
	Gram negative bacilli	Aeromonas veronii	1			1	H	GI, B, SSTIs, R, UTI		doi: 10.1128/CMR.00039-09
	Gram positive bacilli	Bacillus pumilus	1			1	H (rare)	SSTIs, B (Central venous catheter infection)		https://doi.org/10.1086/511077	https://doi.org/10.1186/1476-0711-6-12
	Gram positive bacilli	Corynebacterium casei	1			1	Opportunistic pathogen (H) rare	Not reported		doi: 10.1128/JCM.00796-12	*found on surfaces of smear cheeses	doi: 10.1128/JB.06496-11
	Gram negative bacilli	Cronobacter sp		1		1	H	B, R, SSTIs, Osteomyelitis		doi: 10.3201/eid2009.140545
	Gram negative bacilli	Delftia tsuruhatensis	2			2	Opportunistic pathogen (H) rare	R		doi: 10.3201/eid2403.160939
	Gram negative bacilli	Empedobacter falsenii	1			1	Opportunistic pathogen (H)	R, UTI		https://doi.org/10.1016/j.meegid.2022.105234
	Gram negative bacilli	Enterobacter kobei			1	1	Opportunistic pathogen (H)	UTI, B, R, intra-abdominal infections		https://doi.org/10.1016/j.diagmicrobio.2005.06.008	https://doi.org/10.3389/fcimb.2021.677089
	Gram negative bacilli	Enterobacter roggenkampii			1	1	Opportunistic pathogen (H)	B, UTI, GI		https://doi.org/10.3389/fcimb.2021.677089
	Gram positive cocci	Enterococcus casseliflavus			1	1	H	B		doi: 10.2147/IDR.S398739
	Gram negative bacilli	Escherichia coli	1			1	H	GI, UTI, R, B		https://www.ncbi.nlm.nih.gov/books/NBK564298/
	Gram positive bacilli	Lysinibacillus fusiformis		1		1	Opportunistic pathogen (H)	B, SSTIs, R		https://doi.org/10.5740/jaoacint.18-0092
	Gram positive cocci	Macrococcus canis	1	1		2	Opportunistic pathogen (H), Zoonosis?	skin infection		https://doi.org/10.1016/j.meegid.2021.105125
	Gram positive cocci	Macrococcus caseolyticus	7	1	1	9	Animal pathogen, opportunistic pathogen (H) rare	Not reported		https://doi.org/10.1186/s12866-022-02679-8
	Gram positive cocci	Mammaliicoccus sciuri	1	1		2	commonly Animal pathogen, opportunistic pathogen (H)	W, UTI, B		doi: 10.14202/vetworld.2023.291-295	doi: 10.1128/JCM.43.6.2782-2785.2005
	Gram negative bacilli	Mixta calida	1			1	Opportunistic pathogen (H)	B, meningitis		DOI: 10.1016/j.chest.2022.08.115
	Gram negative coccobacilli	Moraxella osloensis			2	2	opportunistic pathogen (H) rare	B, endocarditis, septic arthritis, meningitis, osteomyelitis		doi: 10.1016/j.ijscr.2017.10.022
	Gram negative bacilli	Ochrobactrum anthropi			1	1	opportunistic pathogen (H) rare	B		doi: 10.13107/jocr.2022.v12.i03.2730
	Gram negative bacilli	Pantoea eucrina		1		1	Plant pathogen	-		https://doi.org/10.1186/s12866-024-03561-5	*Other spp. can cause human infections
	Gram negative bacilli	Pantoea piersonii	1			1	Plant pathogen	-		https://doi.org/10.1186/s12866-024-03561-5	*Other spp. can cause human infections
	Gram negative bacilli	Pluralibacter gergoviae			2	2	opportunistic pathogen (H) rare	Nosocomial infection		https://doi.org/10.3390/pathogens12111335
	Gram positive bacilli	Priestia megaterium			1	1	opportunistic pathogen (H) rare	B, SSTIs, meningitis		https://doi.org/10.1128/mra.00403-21	doi: 10.23750/abm.v91i14-S.10849
	Gram negative bacilli	Pseudomonas putida		2		2	opportunistic pathogen (H) rare	B, R, SSTIs, HAI		doi: 10.1097/MD.0000000000032145
	Gram positive cocci	Rothia amarae		1	1	2	NH	-		https://doi.org/10.1016/j.meegid.2021.104877	*ยังไม่มีรายงานการติดเชื้อจาก species นี้
	Gram positive cocci	Rothia endophytica		2		2	NH	-		https://doi.org/10.1016/j.meegid.2021.104877	*ยังไม่มีรายงานการติดเชื้อจาก species นี้
CoNS	Gram positive cocci	Staphylococcus arlettae	1			1	Opportunistic pathogen (H)	B, rheumatic mitral stenosis		https://doi.org/10.1128/jb.01732-12
	Gram positive cocci	Staphylococcus aureus			1	1	Opportunistic pathogen (H), strongly pathogenic	B, SSTIs, R, osteomyelitis, endocarditis		doi: 10.1128/CMR.00134-14
CoNS	Gram positive cocci	Staphylococcus epidermidis	3			3	Opportunistic pathogen (H)	B, endocarditis		doi: 10.1038/nrmicro2182
CoNS	Gram positive cocci	Staphylococcus haemolyticus			1	1	Opportunistic pathogen (H)	nosocomial infections, B, meningitis, endocarditis		doi: 10.3390/microorganisms10061130
CoNS	Gram positive cocci	Staphylococcus hominis		3		3	Opportunistic pathogen (H)	B. endocarditis		doi: 10.1155/2022/7183049
CoNS	Gram positive cocci	Staphylococcus kloosii	12	3		15	Opportunistic pathogen (H) rare	B, W		DOI: 10.25107/2474-1655.2073
CoNS	Gram positive cocci	Staphylococcus saprophyticus	3	7	3	13	Opportunistic pathogen (H)	UTI, GI		doi: 10.3389/fmicb.2021.663768
CoNS	Gram positive cocci	Staphylococcus xylosus	1	1		2	ส่วนใหญ่ Nonpathogenic	-		doi: 10.1128/AEM.01629-07
	Gram negative bacilli	Stenotrophomonas maltophilia	3			3	Opportunistic pathogen (H)	R, B, SSTIs, UTI, eye infections		doi: 10.1128/CMR.00019-11
							36
		58.6957
