# Supplementary material for: Identification of bacteria on Thai banknotes and coins using MALDI-TOF mass spectrometry and their phenotypic antimicrobial susceptibility profiles
Source: PeerJ. 2025 May 20;13:e19465. doi: 10.7717/peerj.19465 (PMC12101445; doi:10.7717/peerj.19465)
Supplement: Supplemental Information 5 [file peerj-13-19465-s005.xlsx]

## Sheet: AST(1)
Supplementary Table S5. Results of antimicrobial susceptibility tests by using the Kirby-Bauer disc diffusion methods
Code	DST	Clindamycin (DA)		Erythromycin (E)		Cefoxitin (FOX)		Trimethoprim/sulfamethoxazole (SXT)		Penicillin (P)
		Diameter(mm)	R,I,S	Diameter(mm)	R,I,S	Diameter(mm)	R,I,S	Diameter(mm)	R,I,S	Diameter(mm)	R,I,S
I1-1-C1/S1	1. Staphylococcus kloosii	28	S	32	S	30	S	40	S	16	R
S1-1-C74/S1	2. Staphylococcus kloosii	20	I	23	S	24	S	28	S	28	R
M1-1-C80/S2	3. Staphylococcus kloosii	20	I	25	S	26	S	32	S	13	R
I1-1-B1/S1	4. Staphylococcus kloosii	24	S	27	S	23	S	32	S	14	R
I2-1-B5/S1	5. Staphylococcus hominis	26	S	28	S	24	S	30	S	32	S
F2-1-B63/S1	6. Staphylococcus hominis	24	S	24	S	26	S	18	S	13	R
G2-1-B132/S1	7. Staphylococcus hominis	25	S	24	S	25	S	19	S	11	R
C2-1-B19/S1	8. Staphylococcus xylosus	26	S	24	S	25	S	25	S	24	R
G1-3-C123/S1	9. Staphylococcus xylosus	15	I	24	S	25	S	26	S	20	R
G2-2-C127/S2	10. Staphylococcus saprophyticus	28	S	26	S	23	S	30	S	26	R
C3-2-B24/S1	11. Staphylococcus saprophyticus	28	S	27	S	28	S	30	S	30	S
T3-1-B70/S1	12. Staphylococcus saprophyticus	27	S	28	S	28	S	28	S	24	R
S2-1-B74/S1	13. Staphylococcus saprophyticus	27	S	28	S	28	S	30	S	23	R
O2-1-B81/S1	14. Staphylococcus saprophyticus	25	S	24	S	25	S	24	S	20	R
R1-2-C135/S1	15. Staphylococcus epidermidis	28	S	28	S	30	S	32	S	40	S
A1-2-B31/S2	16. Staphylococcus epidermidis	24	S	30	S	28	S	32	S	40	S
E1-2-B46/S2	17. Staphylococcus arlettae	13	R	9	R	30	S	29	S	15	R
S3-1-B77/S1	18. Staphylococcus haemolyticus	10	R	7	R	14	R	22	S	6	R
N3-1-B100/S1	19. Staphylococcus aureus	26	S	25	S	28	S	28	S	10	R
Code	DST	Ampicillin (AMP)		Vancomycin (VA)		Gentamycin (CN 120 ug)		Penicillin (P)
		Diameter(mm)	R,I,S	Diameter(mm)	R,I,S	Diameter(mm)	R,I,S	Diameter(mm)	R,I,S
K3-2-B128/S1	20. Enterococcus casseliflavus	15	S	19	S	23	S	19	S
Code	DST	Trimethoprim/sulfamethoxazole (SXT)		Levoflaxacin (LEV)
		Diameter(mm)	R,I,S	Diameter(mm)	R,I,S
N1-2-C84/S1	21. Stenotrophomonas maltophilia	30	S	40	S
Code	DST	Ampicillin (AMP)		Ceptazidime (CAZ)		Cefotaxime (CTX)		Trimethoprim/sulfamethoxazole (SXT)		Ampicillin/Clavulonic acid (AMC)		Imipenem (IMP)		Gentamycin (CN)		Meropenem (MEM)
		Diameter(mm)	R,I,S	Diameter(mm)	R,I,S	Diameter(mm)	R,I,S	Diameter(mm)	R,I,S	Diameter(mm)	R,I,S	Diameter(mm)	R,I,S	Diameter(mm)	R,I,S	Diameter(mm)	R,I,S
F3-1-B64/S2	22. Enterobacter roggenkampii	7	R	20	I	27	S	24	S	14	I	23	S	18	S	23	S
F3-1-B64/S3	23. Enterobacter kobei	6	R	6	R	20	R	25	S	12	R	25	S	18	S	25	S
T1-1-B65/S2	24. Escherichia coli	6	R	18	I	31	S	28	S	9	R	28	I	18	S	26	S
Code	DST	Ceftazidime (CAZ)		Gentamycin (10) (CN)		Ciprofloxacin (CIP)		Meropenem (MEM)		Amikacin (AK)
		Diameter(mm)	R,I,S	Diameter(mm)	R,I,S	Diameter(mm)	R,I,S	Diameter(mm)	R,I,S	Diameter(mm)	R,I,S
P2-1-B105/S1	25. Pseudomonas putida	18	S	23	S	28	S	9	R	23	S
O2-1-B149/S2	26. Pseudomonas putida	20	S	20	S	28	S	16	R	25	S
T2-1-B68/S2	27. Acinetobacter baumannii	14	R	18	S	14	R	6	R	18	S
P1-1-B101/S1	28. Acinetobacter baumannii	15	I	16	S	22	S	6	R	16	I

## Sheet: AST(2)
Antibiotic tested	Coagulase-negative staphylococci (CoNS) (n=18)			S. aureus (n=1)			E. casseliflavus (n=1)														Antimicrobial drugs and S-isolates=1, NS-isolates = 0																	Antimicrobial drugs and S-isolates=1, NS-isolates = 0
	Resistant	Intermediate	Susceptible	Resistant	Intermediate	Susceptible	Resistant	Intermediate	Susceptible										Colony for DST	Shop type	P	DA	E	FOX	SXT											organism		P	DA	E	FOX	SXT	Fusidic acid	Tetracyclin
Penicillin	14	0	4	1	0	0	0	0	1									C1/S1	1. Staphylococcus kloosii	1	0	1	1	1	1										N2-1-B99/S1	Macrococcus canis		1	1	1	1	1	1	1
Clindamycin	2	3	13	0	0	1	-	-	-									C74/S2	2. Staphylococcus kloosii	1	0	0	1	1	1			Condition highlight							R1-1-B140/S1	Macrococcus canis		1	0	0	1	1	1	1
Erythromycin	2	0	16	0	0	1	-	-	-									C80/S2	3. Staphylococcus kloosii	1	0	0	1	1	1												Total	2	1	1	2	2	2	2		2	1	1	2
Cefoxitin	1	0	17	0	0	1	-	-	-									B1/S1	4. Staphylococcus kloosii	1	0	1	1	1	1		P	DA	E	FOX	SXT						%S	100	50	50	100	100	100	100		100	50	50	100
Trimethoprim/ sulfamethoxazole	0	0	18	0	0	1	-	-	-											Total	0	2	4	4	4		0	2	4	4	4				M1-1-C80/S1	Macrococcus caseolyticus		1	1	1	1	1	0	1
Ampicillin	-	-	-	-	-	-	0	0	1											%S	0	50	100	100	100		0	50	100	100	100				K1-1-C112/S1	Macrococcus caseolyticus		1	1	1	1	1	1	0
Vancomycin	-	-	-	-	-	-	0	0	1									B5/S1	5. Staphylococcus hominis	2	1	1	1	1	1										I1-2-B2/S1	Macrococcus caseolyticus		1	0	0	1	1	1	1
Gentamycin 120 ug	-	-	-	-	-	-	0	0	1									B63/S1	6. Staphylococcus hominis	2	0	1	1	1	1										L1-1-B110/S1	Macrococcus caseolyticus		1	0	0	1	1	1	0
**CoNS; S. kloosii(4), S. hominis(3), S. xylosus(2), S. saprophyticus(5), S. eidrmidis(2), S. arlettae(1), S. haemolyticus(1)																		B132/S1	7. Staphylococcus hominis	2	0	1	1	1	1
																				Total	1	3	3	3	3		1	3	3	3	3
Antibiotic tested	A. baumannii (n=2)			P. putida (n=2)			E. coli (n=1)			Enterobacter spp. (n=2)			Stenotrophomonas maltophilia (n=1)							%S	33.3333	100	100	100	100		33.3333	100	100	100	100
	Resistant	Intermediate	Susceptible	Resistant	Intermediate	Susceptible	Resistant	Intermediate	Susceptible	Resistant	Intermediate	Susceptible	Resistant	Intermediate	Susceptible			B19/S1	8. Staphylococcus xylosus	2	0	1	1	1	1												Total	4	2	2	4	4	3	2		4	2	2	4
Ampicillin	-	-	-	-	-	-	1	0	0	2	0	0	-	-	-			C123/S1	9. Staphylococcus xylosus	3	0	0	1	1	1												%S	100	50	50	100	100	75	50		100	50	50	100
Ceptazidime	1	1	0	0	0	2	0	1	0	1	1	0	-	-	-					Total	0	1	2	2	2		0	1	2	2	2					Macrococcus spp.(5)	Total	6	3	3	6	6	5	4		6	3	3	6
Cefotaxime	-	-	-	-	-	-	0	0	1	1	0	1	-	-	-					%S	0	50	100	100	100		0	50	100	100	100						%S	100	50	50	100	100	83.3333	66.6667		100	50	50	100
Trimethoprim/ sulfamethoxazole	-	-	-	-	-	-	0	0	1	0	0	2	0	0	1			C127/S2	10. Staphylococcus saprophyticus	2	0	1	1	1	1
Ampicillin/ Clavulonic acid	-	-	-	-	-	-	1	0	0	1	1	0	-	-	-			B24/S1	11. Staphylococcus saprophyticus	2	1	1	1	1	1
Imipenem	-	-	-	-	-	-	0	1	0	0	0	2	-	-	-			B70/S1	12. Staphylococcus saprophyticus	1	0	1	1	1	1																				AK	CN	CAZ	MEM	CIP
Meropenem	2	0	0	2	0	0	0	0	1	0	0	2	-	-	-			B74/S1	13. Staphylococcus saprophyticus	1	0	1	1	1	1																	L2-2-B114/S1	Acinetobacter bereziniae		1	1	1	1	1
Gentamycin 10 ug	0	0	2	0	0	2	0	0	1	0	0	2	-	-	-			B81/S1	14. Staphylococcus saprophyticus	1	0	1	1	1	1																	N2-1-B96/S2	Acinetobacter bereziniae		1	1	1	1	1
Amikacin	0	1	1	0	0	2	-	-	-	-	-	-	-	-	-					Total	1	5	5	5	5		1	5	5	5	5											N2-1-B99/S4	Acinetobacter bereziniae		1	1	0	1	1
Ciprofloxacin	1	0	1	0	0	2	-	-	-	-	-	-	-	-	-					%S	20	100	100	100	100		20	100	100	100	100													Total	3	3	2	3	3
Levoflaxacin	-		-	-	-	-	-	-	-	-	-	-	0	0	1			C135/S1	15. Staphylococcus epidermidis	2	1	1	1	1	1																			%S	100	100	66.6667	100	100
																		B31/S2	16. Staphylococcus epidermidis	2	1	1	1	1	1																	E1-2-B48/S1	Acinetobacter defluvii		1	1	0	1	1
																				Total	2	2	2	2	2		2	2	2	2	2													Total	1	1	0	1	1
																					100	100	100	100	100		100	100	100	100	100													%S	100	100	0	100	100
																		B46/S2	17. Staphylococcus arlettae	2	0	0	0	1	1																	R1-1-B140/S2	Acinetobacter gandensis		1	1	0	1	0
																				%S	0	0	0	100	100		0	0	0	100	100													Total	1	1	0	1	0
																																												%S	100	100	0	100	0
																		B77/S1	18. Staphylococcus haemolyticus	1	0	0	0	0	1																	M3-1-B92/S1	Acinetobacter indicus		1	1	1	1	1
																				%S	0	0	0	0	100		0	0	0	0	100													Total	1	1	1	1	1
																																												%S	100	100	100	100	100
																		B100/S1	19. Staphylococcus aureus	1	0	1	1	1	1																	R1-1-B140/S3	Acinetobacter junii		1	1	1	1	1
																				%S	0	100	100	100	100		0	100	100	100	100													Total	1	1	1	1	1
																			Staphylococcus	Total	4	14	17	18	19																			%S	100	100	100	100	100
																				%S	21.0526	73.6842	89.4737	94.7368	100																	E2-1-B49/S2	Acinetobacter pittii		1	1	1	1	1
																					P	AMP	Van	h-CN			P	AMP	Van	h-CN														Total	1	1	1	1	1
																		B128/S1	20. Enterococcus casseliflavus	2	1	1	1	1																				%S	100	100	100	100	100
																				%S	100	100	100	100			100	100	100	100												K3-2-B128/S4	Acinetobacter radioresistens		1	1	1	1	1
																									SXT	LEV		SXT	LEV															Total	1	1	1	1	1
																		C84/S1	21. Stenotrophomonas maltophilia	2					1	1						CAZ	CTX	SXT	CN	IMP	MEM							%S	100	100	100	100	100
																				%S					100	100		100	100													K2-1-B124/S2	Acinetobacter seifertii		1	1	0	1	1
																					AMP	AMC	CAZ	CTX	SXT	CN	IMP	MEM		AMP	AMC	0	100	100	100	100	100							Total	1	1	0	1	1
																		B64/S2	22. Enterobacter roggenkampii	1	0	0	0	1	1	1	1	1																%S	100	100	0	100	100
																				%S	0	0	0	100	100	100	100	100		0	0	0	0	100	100	100	100					D1-1-B55/S3	Acinetobacter ursingii		1	1	0	1	1
																		B64/S3	23. Enterobacter kobei	1	0	0	0	0	1	1	1	1														O1-1-B78/S1	Acinetobacter ursingii		1	1	0	1	1
																				%S	0	0	0	0	100	100	100	100		0	0	0	100	100	100	0	100					G3-1-B137/S1	Acinetobacter ursingii		1	1	1	1	1
																		B65/S2	24. Escherichia coli	1	0	0	0	1	1	1	0	1																Total	3	3	1	3	3
																				%S	0	0	0	100	100	100	0	100		0	0	MEM	CIP											%S	100	100	33.3333	100	100
																																										P2-1-B105/S2	Acinetobacter variabilis		1	1	1	1	1
																					AK	CN	CAZ	MEM	CIP				AK	CN	CAZ													Total	1	1	1	1	1
																		B105/S1	25. Pseudomonas putida	1	1	1	1	0	1																			%S	100	100	100	100	100
																		B149/S2	26. Pseudomonas putida	1	1	1	1	0	1							0	100										Acinetobacter spp. (14)	Total	15	16	8	14	14
																				Total	2	2	2	0	2																			%S	93.75	100	50	87.5	87.5
																				%S	100	100	100	0	100				100	100	100
																		B68/S2	27. Acinetobacter baumannii	1	1	1	0	0	0
																		B101/S1	28. Acinetobacter baumannii	1	0	1	0	0	1							0	50
																				Total	1	2	0	0	1
																				%S	50	100	0	0	50				50	100	0
[truncated: 3 more columns]
